# Supplementary material for: The Oncology Safety of Diagnostic Hysteroscopy in Early-Stage Endometrial Cancer: A Systematic Review and Meta-Analysis
Source: PubMed Central journal article supplement (PMC8566916; doi:10.3389/fonc.2021.742761), 2021-10-21

# Funnel plot

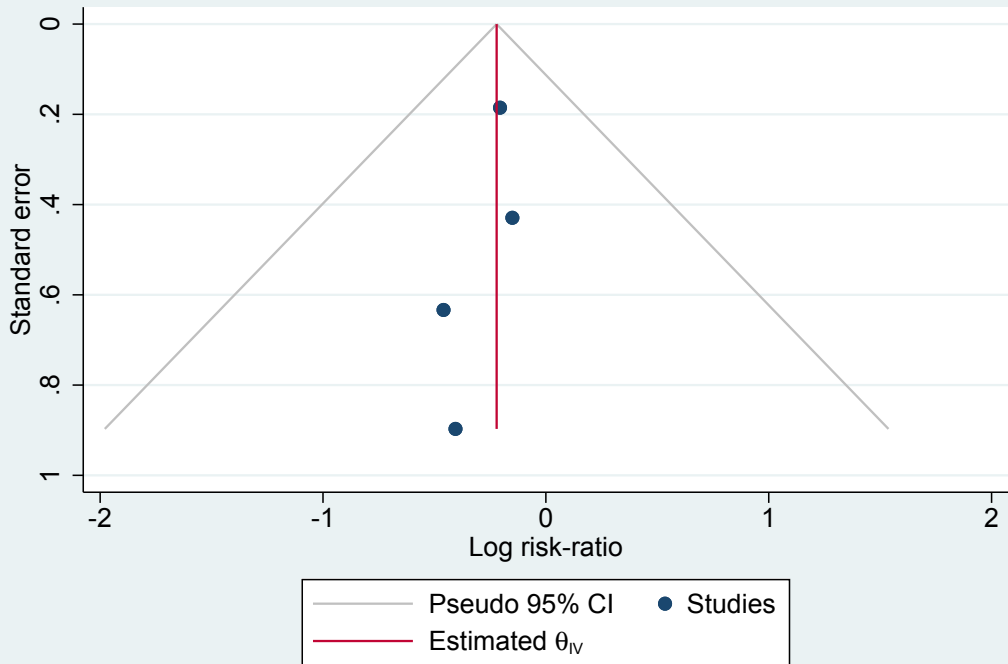

Supplement: Image_1.pdf [file Image_1.pdf]
